# Supplementary material for: A large special posterior mitral valve aneurysm without infective endocarditis and literature review
Source: Research Square preprint supplement (doi:10.21203/rs.3.rs-2253657/v1), 2022-11-15
Supplement: Supplementary file 1 [file f0351c41f89dcd60c7d070e4.xlsx]

## Sheet: Sheet1
Table 1 Reported cases of posterior mitral leaflet aneurysm
patient ID	Age(years)/sex	presence of heart failure	enbolism	endocarditis	sympotom	mitral valve vegetation	Infective organism	MVA(size)	AR	MR	surgery	Reference
1	22/M	+	-	+	fever,dyspnea	+	S.aureus	12*11	-	modetate	-	Vilacosta, I., et al.7 (1999)
2	40/F	-	-	+	fever,dyspnea	+	culture negative	3*3	-	severe	+ /MVR	Vilacosta, I., et al.7 (1999)
3	28/M	+	-	+	fever,dyspnea	-	culture negative	NA	NA	severe	Die before operation	Mol, B.A.J.M., et al.5 (2016)
4	64/M	+	-	+	fever,dyspnea	-	S.aureus	5	-	severe	+ /MVR	Mol, B.A.J.M., et al.5 (2016)
5	34/M	-	-	-	dyspnea	-	culture negative	NA	-	severe	+ /NA	Isilak, Z., et al.6 (2013)
6	77/F	-	-	+	fever,fatigue	+	streptococcus agalactiae	NA	-	moderate to mild	-	Ruisanchez Villar, C., et al.1 (2021)
7	70/F	-	-	-	dyspnea	-	-	16*13	moderate	severe	MVP	Kim, D., et al.8 (2012)
8	77/F	-	-	-	-	-	-	16*19	severe	severe	MVR	Hotchi, J., et al.9 (2011)
M: male; F: female; AR: aortic regurgitation; MR: mitral regurgitation; MVA: mitral valve aneurysm; MVR: mitral valve replacement; MVP: mitral valve annuloplasty; +: present; -: absent; NA: not available.
